# Supplementary material
Source: ML conference proceedings conference paper supplement (https://openreview.net/forum?id=QE_h_FgqdEu)
Supplement: supplementary_material [file attachment]

# 1 Supplement

## 1.1 Checklist Items

### 1. For all authors...

- (a) Do the main claims made in the abstract and introduction accurately reflect the paper’s contributions and scope? [\[Yes\]](#)
- (b) Did you describe the limitations of your work? [\[Yes\]](#) **Sec. 7**
- (c) Did you discuss any potential negative societal impacts of your work? [\[Yes\]](#) **Supplement**
- (d) Have you read the ethics review guidelines and ensured that your paper conforms to them? [\[Yes\]](#)

### 2. If you are including theoretical results...

- (a) Did you state the full set of assumptions of all theoretical results? [\[N/A\]](#)
- (b) Did you include complete proofs of all theoretical results? [\[N/A\]](#)

### 3. If you ran experiments...

- (a) Did you include the code, data, and instructions needed to reproduce the main experimental results (either in the supplemental material or as a URL)? [\[Yes\]](#) **Code, instructions, and MSR data are included in the supplement**
- (b) Did you specify all the training details (e.g., data splits, hyperparameters, how they were chosen)? [\[Yes\]](#) **Sec: 4, 6 and supplement**
- (c) Did you report error bars (e.g., with respect to the random seed after running experiments multiple times)? [\[No\]](#)
- (d) Did you include the total amount of compute and the type of resources used (e.g., type of GPUs, internal cluster, or cloud provider)? [\[Yes\]](#) **Supplement**

### 4. If you are using existing assets (e.g., code, data, models) or curating/releasing new assets...

- (a) If your work uses existing assets, did you cite the creators? [\[Yes\]](#) **Sec. 6**
- (b) Did you mention the license of the assets? [\[N/A\]](#)
- (c) Did you include any new assets either in the supplemental material or as a URL? [\[Yes\]](#) **Supplement**
- (d) Did you discuss whether and how consent was obtained from people whose data you’re using/curating? [\[Yes\]](#) **Supplement**
- (e) Did you discuss whether the data you are using/curating contains personally identifiable information or offensive content? [\[N/A\]](#)

### 5. If you used crowdsourcing or conducted research with human subjects...

- (a) Did you include the full text of instructions given to participants and screenshots, if applicable? [\[N/A\]](#)
- (b) Did you describe any potential participant risks, with links to Institutional Review Board (IRB) approvals, if applicable? [\[N/A\]](#)
- (c) Did you include the estimated hourly wage paid to participants and the total amount spent on participant compensation? [\[N/A\]](#)

## 1.1.1 Impact Considerations

Since an inherent goal in our method is to identify and characterize human activity, there are privacy considerations could be brought up. These concerns apply to both the potential for unwanted monitoring of activity, as well as potential exposure in identifying information with regard to the nature of, and sequence of tasks performed.

## 1.1.2 Data Acquisition

The Microsoft Research Human Activity (MSR) dataset<sup>1</sup> (Morris et al., 2014) was obtained under a CDLA-Permissive license. The time series included in this submission have been truncated to the first 5 minutes of activity.

<sup>1</sup><https://msropendata.com/datasets/799c1167-2c8f-44c4-929c-227bf04e2b9a>

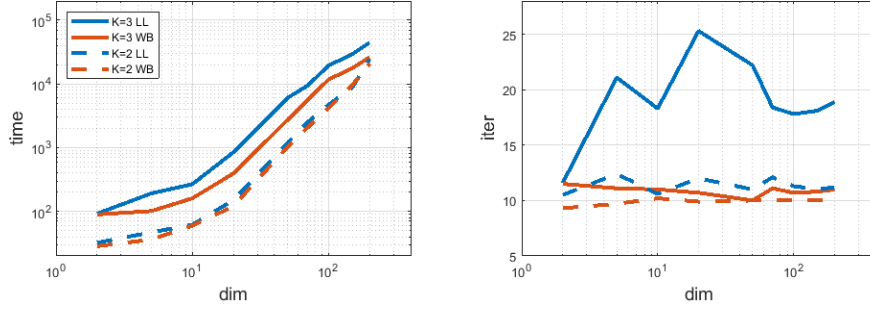

Figure 1: (left) Total time required for convergence optimizing simulated data outlined in Sec. 1.2 across data dimensions ranging from 2 to 200. Optimization with respect to Wasserstein-Bures geometry (red) for PSD matrices converges much faster than using Euclidean geometry (blue) parameterized by the Cholesky (LL) decomposition for both 2-state (dotted), and 3-state (solid) problems. (right) total number of line-search iterations required to reach convergence. Both methods converge to similar results.

49 The Beep Test (BT) dataset is a proprietary dataset and thus is not included in this submission and is  
 50 unfortunately not available to share with the public. It was collected under approval by an affiliated  
 51 institution’s Institutional Review Board (IRB). All data has been deidentified before it was shared  
 52 with study authors. All study authors are approved by their institutional IRB to use this deidentified  
 53 wearable sensor data for research purposes.

### 54 1.1.3 Compute Time and Resources

55 Results were obtained using 4 CPU cores with 16 GB RAM, replicated for each time series on an  
 56 internal cluster using slurm. On average convergence was reached in 6 hours.

## 57 1.2 Optimization Simulations

---

#### Algorithm 1: Riemannian Manifold Line Search (Absil et al., 2008)

---

**Given :**  $(\mathcal{M}, g_p^{\mathcal{M}}(\cdot, \cdot))$ : Riemannian manifold

$f(p)$ : Smooth scalar function on the manifold

$\exp_p^{\mathcal{M}}$ : Exponential map

$\alpha_0$ : Initial step

$\beta$ : Sufficient decrease

$c$ : Contraction factor

$\eta$ : Convergence threshold

```

1 while  $f(p^{(n)}) - f(p^{(n+1)}) > \eta$  do
2    $\alpha = \alpha_0$ 
3   while
4      $\left( f(p^{(n)}) - f\left(\exp_{p^{(n)}}^{\mathcal{M}}(\alpha \text{grad} f(p^{(n)}))\right) \right) > \alpha \beta g_{p^{(n)}}^{\mathcal{M}}(\text{grad} f(p^{(n)}), \text{grad} f(p^{(n)}))$  do
5        $\alpha = c\alpha$ 
6   end
7    $p^{(n+1)} = \exp_{p^{(n)}}^{\mathcal{M}}(\alpha \text{grad} f(p^{(n)}))$ 
8 end
```

---

58 To motivate the choice of the Wasserstein-Riemannian manifold for optimization, we compare the  
 59 optimization speeds in terms of wall-clock time and number of line search iterations with the more  
 60 standard Euclidean geometry for covariance matrices (Arsigny et al., 2007) parameterized by the  
 61 Cholesky decomposition. We evaluate performance on a set of simulated time series following our  
 62 data model similar to that shown in Fig. 1 from the main paper where the system state linearly  
 63 interpolates between two pure states over the course of 100 time steps. We vary the dimensionality of

the data ranging from  $d = 2$  to 200, and number of states for  $K = 2, 3$ , repeating the experiment 10 times for each case.

To construct the data, we start by creating a random Gaussian distribution by generating a random mean vector  $\mathbf{m}_1 \sim \mathcal{N}(0, \mathbf{I})$ , and a random PSD matrix  $\mathbf{S}_1$  generated by the method described in (Davies and Higham, 2000) with eigenvalues given by  $\Lambda = \text{diag}([\lambda, \dots, \lambda_d])$  where  $\lambda_i \sim U[0.5, 1.5]$ . A second Gaussian distribution is generated a set distance away such that  $\mathcal{W}_2^2((\mathbf{m}_1, \mathbf{S}_1), (\mathbf{m}_2, \mathbf{S}_2)) = 5$  where  $\mathcal{E}^2(\mathbf{m}_1, \mathbf{m}_2) = 1$ , and  $\mathcal{B}^2(\mathbf{S}_1, \mathbf{S}_2) = 4$ . This is achieved by generating a random vector in the tangent space and traveling the specified distance, along the geodesic on the manifold in the tangent direction. Specifically, for a random tangent vector to the mean  $\mathbf{v} \in \mathbb{R}^d$ , we set  $\mathbf{m}_2 = \mathbf{m}_1 + \frac{1}{\|\mathbf{v}\|_2} \mathbf{v}$ , and for a random symmetric matrix  $\mathbf{V}$ ,  $\mathbf{S}_2 = \exp_{\mathbf{S}_1}^{\mathcal{B}} \left( \frac{2}{g_{\mathbf{S}_1}^{\mathcal{B}}(\mathbf{V}, \mathbf{V})} \mathbf{V} \right)$ , where  $\exp_{\mathcal{B}}^{\mathcal{B}}$  and  $g_{\mathcal{B}}^{\mathcal{B}}$  are the corresponding exponential map and Riemannian metric on the Wasserstein-Bures Manifold (Takatsu, 2011). For the three-state example, this process is repeated to generate a third Gaussian distribution such that  $\mathcal{W}_2^2((\mathbf{m}_2, \mathbf{S}_2), (\mathbf{m}_3, \mathbf{S}_3)) = 5$ .

For the simulated data, the state interpolates between  $\mathbf{e}_1$  to  $\mathbf{e}_2$  over 100 equi-spaced steps. The three-state problem, continues on and interpolates from  $\mathbf{e}_2$  to  $\mathbf{e}_3$  over an additional 100 steps. The empirical Gaussian distributions at each of these intermediate points is generated from  $20d$  samples drawn from  $\rho_{B_t}$  according to the Wasserstein barycentric model described in the main paper. Since this optimization choice only pertains to  $\Theta$ , for the purposes of this experiment we fix  $\mathbf{X}$  as the ground truth thus eliminating the need to estimate  $\mathbf{\Gamma}, \mathbf{H}$ .

Fig. 1 shows that estimating the for  $\Theta$  using Wasserstein Riemannian geometry for Gaussians has improved performance in terms of converge speed in terms of both wall-clock and number of line-search iterations needed to converge. We found no significant difference in the solutions to which the two methods converged.

The python files used to generate the simulated data as well as run the simulated experiments are included in the supplemental code with instructions provided in Sec. 1.5.

### 1.3 Parameter Initialization and Optimization Parameters

| Model Params                         | Initialization                                     | Constraint                                                                                                                              | Description                        |
|--------------------------------------|----------------------------------------------------|-----------------------------------------------------------------------------------------------------------------------------------------|------------------------------------|
| $\gamma_t[k]$                        | $1e-6$                                             | $[0, 1]$                                                                                                                                | State innovation                   |
| $\mathbf{x}_0[k]$                    | $\frac{1}{K}$                                      | $\sum_k \mathbf{x}_0[k] = 1$                                                                                                            | Initial state                      |
| $(\mathbf{a}_1[k], \mathbf{b}_1[k])$ | $(10, 20)$                                         | $\frac{\mathbf{a}_1[k]}{\mathbf{a}_1[k] + \mathbf{b}_1[k]} > 1.1$<br>$\frac{\mathbf{a}_1[k]}{\mathbf{a}_1[k] + \mathbf{b}_1[k]} > 0.15$ | Beta prior for transition dynamics |
| $w$                                  | $0.5$                                              | $[0.01, 0.99]$                                                                                                                          | Weight for Beta mixture prior      |
| $(\mu_k, \mathbf{S}_k)$              | Time series clustering given (Cheng et al., 2020b) | $\mu_k \in \mathbb{R}^d$<br>$\mathbf{S}_k \in \text{Sym}_+^d$                                                                           | Pure state distribution            |

Table 1: Initialization and constraints of learned model parameters. Time index,  $t = 1, \dots, T$  and pure-state index  $k = 1, \dots, K$

The initialization and constraints for the learned model parameters are provided in Table 1. Other fixed parameters for the algorithm are included in Table 2.

For the optimization parameters, we use a learning rate of  $2e-3$  for the ADAM optimization (Kingma and Ba, 2017) of  $\mathbf{\Gamma}, \mathbf{H}$  and a convergence criterion of  $\eta = 0.05$ .

The Riemannian line search used to estimate  $\Theta$  is given in Alg. 1. Our implementation sets  $\alpha_0 = 1e-1$ ,  $\beta = 1e-10$   $c = 0.5$ ,  $\eta = 0.05$

## 1.4 Additional Results

### 1.4.1 MSR Results with Ground Truth Initialization

| Model Params                   | Value                                                                                                       | Description                                                                                                      |
|--------------------------------|-------------------------------------------------------------------------------------------------------------|------------------------------------------------------------------------------------------------------------------|
| $\mathbf{m}_0$                 | $\frac{1}{T} \sum_{t=1}^T \mathbf{y}_t$                                                                     | Used as reference distribution mean for $\Theta$                                                                 |
| $\sigma_0$                     | average eigenvalue of covariance matrices of K-component GMM fit to $\mathbf{y}_t$ (Pedregosa et al., 2011) | $\sigma_0 \mathbf{I}$ used as reference distribution covariance for $\Theta$                                     |
| $\eta$                         | 0.05                                                                                                        | Convergence threshold                                                                                            |
| $(\mathbf{a}_0, \mathbf{b}_0)$ | (1.1, 20)                                                                                                   | Beta prior for stationary dynamics                                                                               |
|                                | 10                                                                                                          | # fixed point iterations for covariance Wasserstein barycenter computation (Álvarez Esteban et al., 2016)        |
|                                | 5000                                                                                                        | # Monte Carlo samples used to compute Wasserstein distance between GMM and Gaussian (Sriperumbudur et al., 2010) |

Table 2: Value of fixed algorithm parameters.

99 In order to stay true to the unsupervised nature  
100 of our problem, in our real-world experiments,  
101 we initialize the pure-state Gaussian model  
102 parameters using the time-series segmentation  
103 algorithm using the unsupervised methods  
104 described in (Cheng et al., 2020a). Since our  
105 problem is non-convex, poor initialization  
106 could lead to local minimum. To ensure that  
107 our reported results are not a result of biased  
108 initialization, we also run the same experiments  
109 initializing  $\Theta$  according to the sample mean  
110 and covariance matrices of each activity given  
111 the ground truth discrete labels of the MSR  
112 data. As shown in Fig. 2, the results given by  
113 this ground truth initialization do not deviate  
114 much from Fig. 6 from the main paper where  
115 the average absolute difference between the  
116 two initialization methods for  $e_W(DWB)$  and  
117  $e_W(GMM)$  are 0.011 and 0.022 respectively.  
118

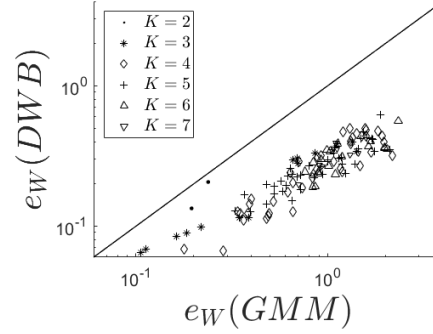

Figure 2: Evaluation comparison between the GMM and Wasserstein barycenter model for the MSR data when using the ground truth discrete labels to initialize the pure-state distribution parameters. Results shown here are close to that shown in the main paper using an unsupervised approach for parameter initialization.

#### 119 1.4.2 Innovation Prior Ablation Study

120 Here Fig. 4 shows the comparison when using  
121 fixed  $\mathbf{a}, \mathbf{b}$  parameters for a single-modal Beta  
122 distribution for the prior on  $\gamma_t$  versus using  
123 the two-component Beta mixture with learnable  
124  $\mathbf{a}, \mathbf{b}, w$  parameters for the transition component  
125 as specified in the main paper in Sec. 4.1.

126 When using a fixed single component Beta prior,  
127 there is a single mode to learn the system dy-  
128 namics in both transition regions (where one  
129 expects more rapid changes in state) and station-  
130 ary regions (where changes are much smaller).  
131 Because of this compromise, the transitions be-  
132 tween states are more sluggish while compared  
133 to the two-component Beta model. The learned pure-state distribution parameters do not differ  
134 much but the overall model fit is improved in the two-component model due to better tracking in  
135 the transition regions. For the two-component Beta prior, the average across all MSR datasets is  
136  $e_W = 0.50$  compared to the average  $e_W = 0.27$  for the single-component fixed Beta model.

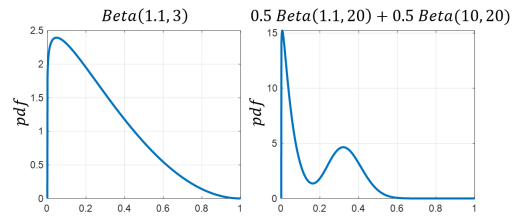

Figure 3: Sample pdfs of single a single component and two-component Beta mixture. Beta distributions are defined on the domain  $[0, 1]$  and are uni-modal for parameters  $a, b > 1$ . The Beta mixture allows us to separately model the stationary and transition dynamics.

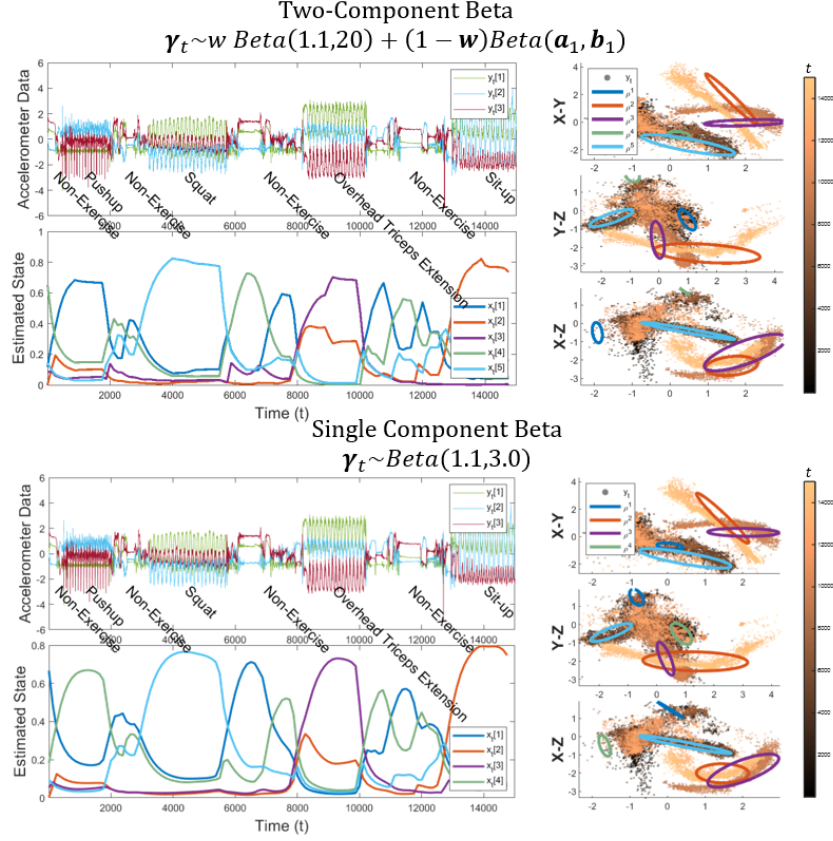

Figure 4: Comparison of model output using a single-component fixed prior versus a two-component learnable prior for the innovations  $\gamma_t$ . While the pure state results in the right column are comparable between the two approaches, the state-variable is more sluggish in adapting to faster transitions in the single-component model.

### 1.4.3 Deep State Space Benchmark

We emphasize that in addition to the characterization of the underlying distribution shown in the above evaluation, our DWB approach identifies a set of discrete pure states in the system and yields a directly-interpretable per-sample state representation; the Wasserstein barycentric mixing weights for each pure-state is directly given by the corresponding component of the simplex-state vector. In contrast, there is no direct interpretation of the latent state and no equivalent comparison to the learned pure-state in the DSS model. Additional ad hoc processing (e.g. clustering) of the DSS latent state space would be required to achieve this, which is beyond the scope of our present paper. Tab. 3 highlights additional similarities and differences between the two models.

As mentioned, we run the DSS with two parameter settings. The first uses 2 hidden layers each with 5 neurons for a total of 94 learned parameters for each transmission and emission networks. The second uses the default parameters included with the code<sup>2</sup> which contains 3 hidden layers for the transition and emission networks with a hidden state dimension of 200 for a total of for each neural network. In both cases, the latent space has dimension  $(K-1)$  (to match the dimensionality of the  $K$ -simplex), an RNN of 2 layers and 600 nodes each is used as the variational approximation network, and training occurs over 1000 epochs with a learning rate of 0.008. Plots of the variational lower bound show convergence under these conditions

<sup>2</sup><https://github.com/clinicalml/dmm>

|                              | DWB                                             | DSS                                                                    |
|------------------------------|-------------------------------------------------|------------------------------------------------------------------------|
| State Space                  | K-simplex                                       | $R^n$                                                                  |
| State Transition Dynamics    | Beta mixture                                    | Gaussian distribution                                                  |
| State Transition Parameters  | Learnable Beta parameters                       | Neural network parameterizing mean and diagonal covariance of Gaussian |
| Emission distribution model  | Gaussian with full covariance                   | Gaussian with diagonal covariance                                      |
| Number of learned parameters | $O(d^2 K)$ $d$ =data dimension $K$ = # clusters | $O(m^2)$ $m$ =NN hidden layer size                                     |

Table 3: Comparison between DWB and DSS models

#### 1.4.4 Additional Results for MSR Data

We provide the results for learned model parameters for the entire MSR dataset. All plots follow the same format as Fig. 4 from the main paper, where the raw accelerometer data is included in the top right, the learned state in the bottom left, and the scatter plot of the time series overlayed with the estimated pure states projected onto each of the pair-wise axes in the right column.

The plots produced through initialization using change point detection and time series clustering (CPD) discussed in (Cheng et al., 2020a) are in the “MSR\_Plots” folder, and those produced through ground truth discrete labels (GT) are in “MSR\_GT\_Plots”.

### 1.5 Code Instructions

#### 1.5.1 MSR

To run the code <sup>3</sup> and replicate the results reported in our paper,

```
# usage: DynamicalWassersteinBarycenters.py dataSet dataFile debugFolder
↪ interpModel [--ParamTest PARAMTEST] [--lambda LAM] [--s S]

# Sample run on MSR data
>> python DynamicalWassersteinBarycenters.py MSR_Batch
↪ ../Data/MSR_Data/subj090_1.mat ../debug/MSR/subj001_1.mat Wass

# Sample run for parameter test
>> python DynamicalWassersteinBarycenters.py MSR_Batch
↪ ../Data/MSR_Data/subj090_1.mat ../debug/ParamTest/subj001_1.mat Wass
↪ --ParamTest 1 --lambda 100 --s 1.0
```

The “interpMethod” is either “Wass” for the Wasserstein barycentric model or “GMM” for the linear interpolation model.

#### 1.5.2 Optimization Simulations

The simulated data and experiment included in this supplement can be replicated using the following commands.

```
# Generate 2 and 3 state simulated data
>> python GenerateOptimizationExperimentData.py
>> python GenerateOptimizationExperimentData_3K.py

# usage: OptimizationExperiment.py FileIn Mode File
```

<sup>3</sup>Code available at [https://github.com/kevin-c-cheng/DynamicalWassBarycenters\\_Gaussian](https://github.com/kevin-c-cheng/DynamicalWassBarycenters_Gaussian)

```

170 # Sample run for optimization experiment
171 >> python OptimizationExperiment.py
    ↪ ../data/SimulatedOptimizationData_2K/dim_5_5.mat/ WB
    ↪ ../debug/SimulatedData/dim_5_5_out.mat

```

170 The “Mode” is either “WB” for Wasserstein-Bures geometry and “Euc” for Euclidean geometry using  
171 Cholesky decomposition parameterization.

### 172 1.5.3 Computation Environment

173 We use Python 3.8 with the package requirements included in "requirements.txt" and copied below.

```

174 _libgcc_mutex=0.1=conda_forge
175 _openmp_mutex=4.5=1_llvm
176 _pytorch_select=0.2=gpu_0
177 blas=2.17=openblas
178 ca-certificates=2020.12.5=ha878542_0
179 certifi=2020.12.5=py38h578d9bd_1
180 cffi=1.14.4=py38h261ae71_0
181 cudatoolkit=8.0=3
182 cudnn=7.1.3=cuda8.0_0
183 cycpler=0.10.0=py_2
184 freetype=2.10.4=h7ca028e_0
185 future=0.18.2=py38h578d9bd_3
186 immutables=0.15=py38h497a2fe_0
187 intel-openmp=2020.2=254
188 joblib=1.0.0=pyhd8ed1ab_0
189 jpeg=9d=h36c2ea0_0
190 kiwisolver=1.3.1=py38h82cb98a_0
191 lcms2=2.11=hccb858e_1
192 ld_impl_linux-64=2.33.1=h53a641e_7
193 libblas=3.8.0=17_openblas
194 libcbblas=3.8.0=17_openblas
195 libedit=3.1.20191231=h14c3975_1
196 libffi=3.3=he6710b0_2
197 libgcc-ng=9.3.0=h5dbcf3e_17
198 libgfortran-ng=7.3.0=hdf63c60_0
199 libgomp=9.3.0=h5dbcf3e_17
200 liblapack=3.8.0=17_openblas
201 liblapacke=3.8.0=17_openblas
202 libopenblas=0.3.10=threads_hb3c22a3_4
203 libpng=1.6.37=h21135ba_2
204 libstdcxx-ng=9.3.0=h6de172a_18
205 libtiff=4.1.0=h4f3a223_6
206 libwebp-base=1.1.0=h36c2ea0_3
207 llvm-openmp=11.0.0=hfc4b9b4_1
208 lz4-c=1.9.2=he1b5a44_3
209 matplotlib-base=3.3.3=py38h5c7f4ab_0
210 mkl=2020.4=h726a3e6_304
211 mkl-service=2.3.0=py38he904b0f_0
212 mkl_fft=1.3.0=py38h5c078b8_1
213 mkl_random=1.2.0=py38hc5bc63f_1
214 ncurses=6.2=he6710b0_1
215 ninja=1.10.2=py38hff7bd54_0
216 numpy=1.19.5=py38h18fd61f_1
217 numpy-base=1.18.5=py38h2f8d375_0
218 olefile=0.46=pyh9f0ad1d_1
219 openssl=1.1.1k=h7f98852_0
220 pillow=8.1.0=py38h357d4e7_1
221 pip=20.3.3=py38h06a4308_0

```

222 pot=0.7.0=py38h950e882\_0  
 223 pycparser=2.20=py\_2  
 224 pyparsing=2.4.7=pyh9f0ad1d\_0  
 225 python=3.8.5=h7579374\_1  
 226 python-dateutil=2.8.1=py\_0  
 227 python\_abi=3.8=1\_cp38  
 228 pytorch=1.7.1=cpu\_py38h36eccb8\_1  
 229 readline=8.0=h7b6447c\_0  
 230 scikit-learn=0.24.1=py38h658cfdd\_0  
 231 scipy=1.5.2=py38h8c5af15\_0  
 232 setuptools=51.1.2=py38h06a4308\_4  
 233 six=1.15.0=py38h06a4308\_0  
 234 sqlite=3.33.0=h62c20be\_0  
 235 threadpoolctl=2.1.0=pyh5ca1d4c\_0  
 236 tk=8.6.10=hbc83047\_0  
 237 tornado=6.1=py38h497a2fe\_1  
 238 wheel=0.36.2=pyhd3eb1b0\_0  
 239 xz=5.2.5=h7b6447c\_0  
 240 zlib=1.2.11=h7b6447c\_3  
 241 zstd=1.4.5=h6597ccf\_2

## 242 References

- 243 P.-A. Absil, R. Mahony, and R. Sepulchre. 2008. *Optimization algorithms on matrix manifolds*. Princeton  
 244 University Press, Princeton, N.J. ; Woodstock. OCLC: ocn174129993.
- 245 Vincent Arsigny, Pierre Fillard, Xavier Pennec, and Nicholas Ayache. 2007. Geometric Means in a Novel Vector  
 246 Space Structure on Symmetric Positive-Definite Matrices. *SIAM J. Matrix Anal. Appl.* 29, 1 (Jan. 2007),  
 247 328–347. <https://doi.org/10.1137/050637996>
- 248 Kevin C. Cheng, Shuchin Aeron, Michael C. Hughes, Erika Hussey, and Eric L. Miller. 2020a. Optimal Transport  
 249 Based Change Point Detection and Time Series Segment Clustering. *arXiv:1911.01325 [cs, eess]* (Feb. 2020).  
 250 <http://arxiv.org/abs/1911.01325> arXiv: 1911.01325.
- 251 Kevin C. Cheng, Eric L. Miller, Michael C. Hughes, and Shuchin Aeron. 2020b. On Matched Filtering for  
 252 Statistical Change Point Detection. *IEEE Open Journal of Signal Processing* 1 (2020), 159–176. <https://doi.org/10.1109/OJSP.2020.3035070> Conference Name: IEEE Open Journal of Signal Processing.
- 254 Philip I. Davies and Nicholas J. Higham. 2000. Numerically Stable Generation of Correlation Matrices and  
 255 Their Factors. *BIT Numerical Mathematics* 40, 4 (Dec. 2000), 640–651. <https://doi.org/10.1023/A:1022384216930>
- 257 Diederik P. Kingma and Jimmy Ba. 2017. Adam: A Method for Stochastic Optimization. *arXiv:1412.6980 [cs]*  
 258 (Jan. 2017). <http://arxiv.org/abs/1412.6980> arXiv: 1412.6980.
- 259 Dan Morris, T. Scott Saponas, Andrew Guillory, and Ilya Kelner. 2014. RecoFit: using a wearable sensor to find,  
 260 recognize, and count repetitive exercises. In *Proceedings of the SIGCHI Conference on Human Factors in*  
 261 *Computing Systems*. ACM, Toronto Ontario Canada, 3225–3234. <https://doi.org/10.1145/2556288.2557116>
- 263 Fabian Pedregosa, Gaël Varoquaux, Alexandre Gramfort, Vincent Michel, Bertrand Thirion, Olivier Grisel,  
 264 Mathieu Blondel, Peter Prettenhofer, Ron Weiss, Vincent Dubourg, Jake Vanderplas, Alexandre Passos, David  
 265 Cournapeau, Matthieu Brucher, Matthieu Perrot, and Édouard Duchesnay. 2011. Scikit-learn: Machine  
 266 Learning in Python. *Journal of Machine Learning Research* 12, 85 (2011), 2825–2830. <http://jmlr.org/papers/v12/pedregosa11a.html>
- 268 Bharath K. Sriperumbudur, Arthur Gretton, Kenji Fukumizu, Bernhard Schölkopf, and Gert R. G. Lanckriet.  
 269 2010. Hilbert Space Embeddings and Metrics on Probability Measures. *Journal of Machine Learning*  
 270 *Research* 11, 50 (2010), 1517–1561. <http://jmlr.org/papers/v11/sriperumbudur10a.html>
- 271 Asuka Takatsu. 2011. Wasserstein geometry of Gaussian measures. *Osaka Journal of Mathematics* 48, 4 (Dec.  
 272 2011), 1005–1026. <https://doi.org/10.18910/4973> Publisher: Osaka University and Osaka City  
 273 University, Departments of Mathematics.



274 Pedro C. Álvarez Esteban, E. del Barrio, J. A. Cuesta-Albertos, and C. Matrán. 2016. A fixed-point approach to  
275 barycenters in Wasserstein space. *arXiv:1511.05355 [math, stat]* (April 2016). [http://arxiv.org/abs/](http://arxiv.org/abs/1511.05355)  
276 1511.05355 arXiv: 1511.05355.
